# Supplementary material
Source: publisher site journal article supplement (https://www.dovepress.com/article/508316)
Supplement: Supplementary file 1 [file get_supplementary_file.php]

**Supplementary Table S1** Sequences of the gene-specific primers

| Gene | Sequences | Species |
| --- | --- | --- |
| *β-Actin* | Forward, TGTCCACCTTCCAGCAGATGT | Rat |
| *β-Actin* | Reverse, AGCTCAGTAACAGTCCGCCTAGA | Rat |
| *IFN-γ* | Forward, CAGGCCATCAGCAACAACAT | Rat |
| *IFN-γ* | Reverse, TCTGGTGACAGCTGGTGAAT | Rat |
| *IL-10* | Forward, AGTGGAGCAGGTGAAGAATGA | Rat |
| *IL-10* | Reverse, ATTTGCTGGTTCCCACACTC | Rat |
| *IL-17A* | Forward, AGTTCAGTGTGTCCAAACGC | Rat |
| *IL-17A* | Reverse, GAGTCCAGGGTGAAGTGGAA | Rat |
| *FOXP3* | Forward,TATTTATGGCGGAGACACGGG | Rat |
| *FOXP3* | Reverse,GTGCAGGGTCCGAGGTATTC | Rat |
| *ROR-γT* | Forward, AGTAGGCCACATTACACTGCT | Rat |
| *ROR-γT* | Reverse, GACCCACACCTCACAAATTGA | Rat |

**Supplementary Figure S1** Raw WB bands


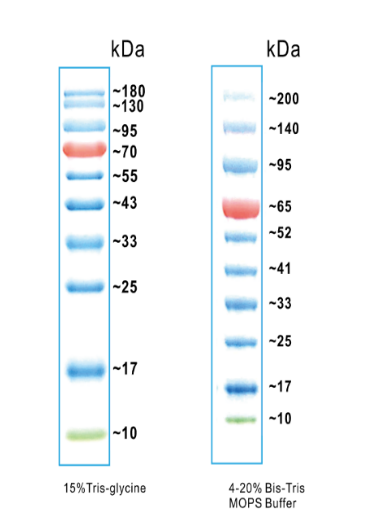


Supplier：Biosharp Item No：BL713A

**p-STAT3**

**
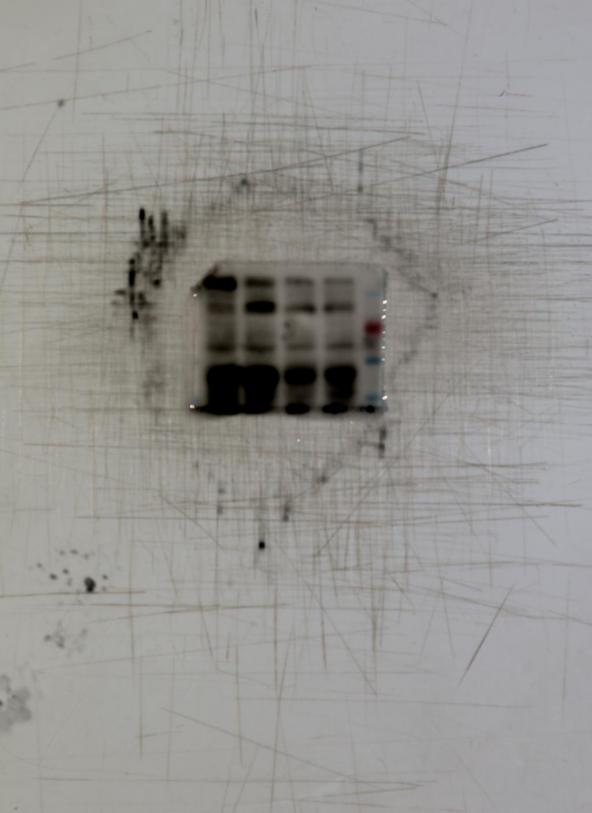
**

**95kDa**

**70kDa**

**55kDa**

**43kDa**

**STAT3**

**
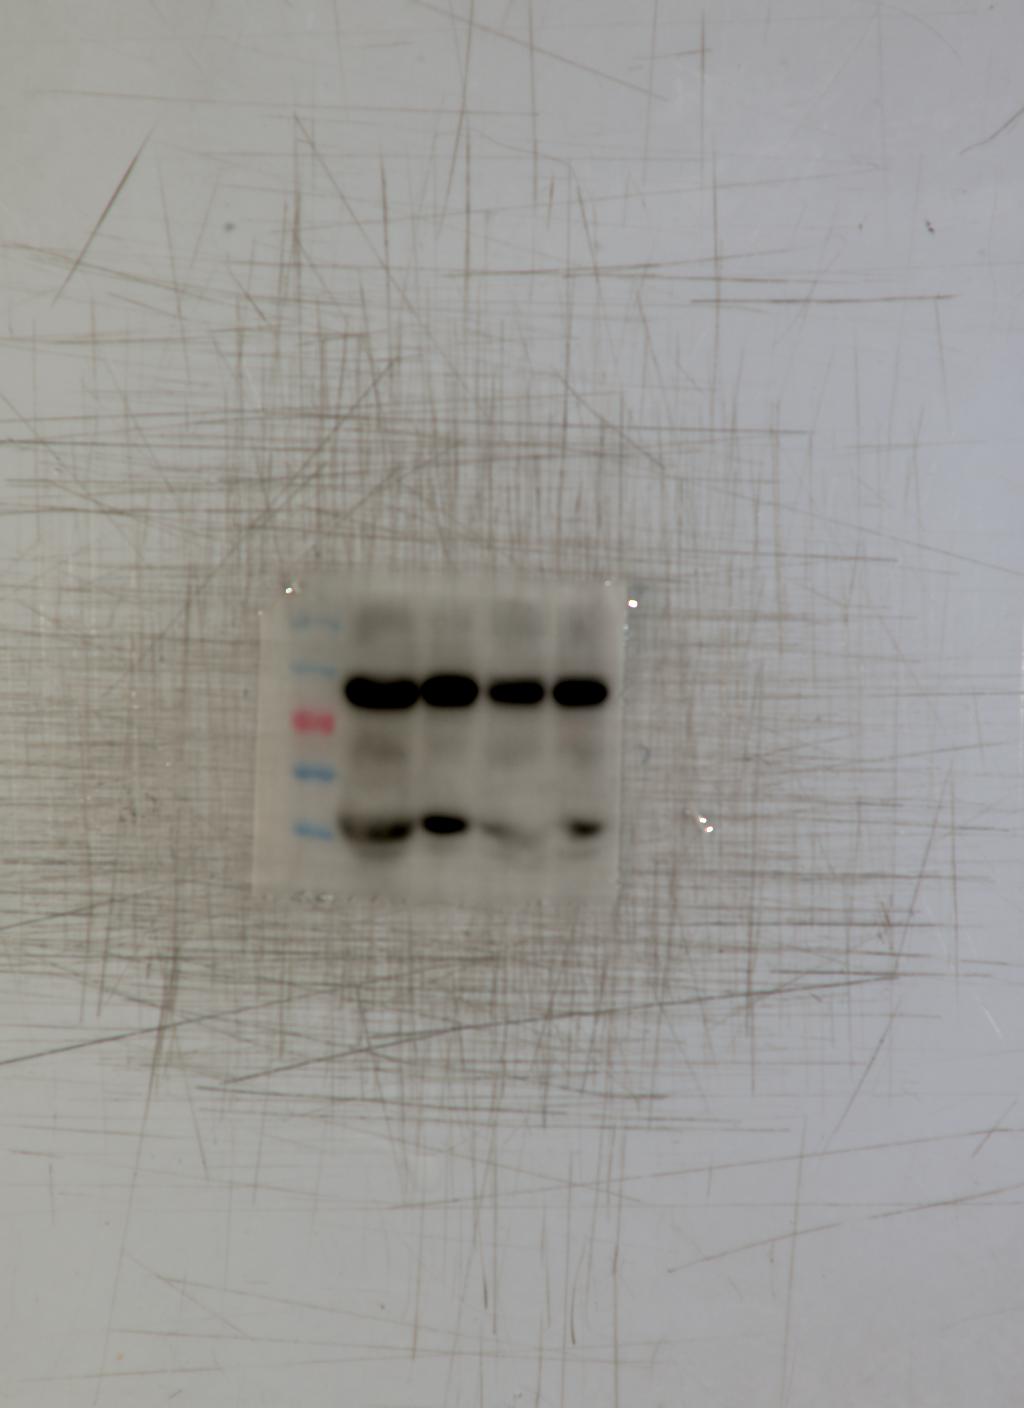
**

**130kDa**

**95kDa**

**70kDa**

**55kDa**

**43kDa**

**P-JNK**

**
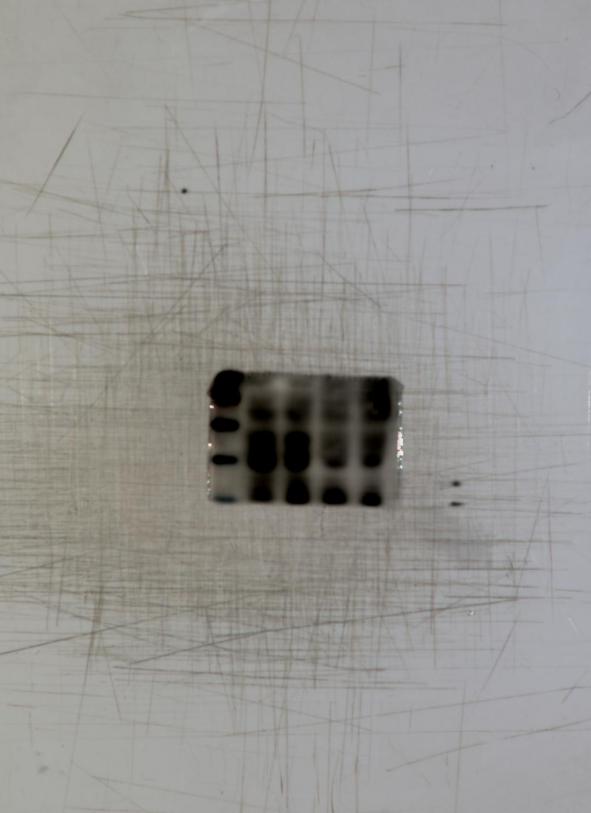
**

**70kDa**

**55kDa**

**43kDa**

**JNK**

**
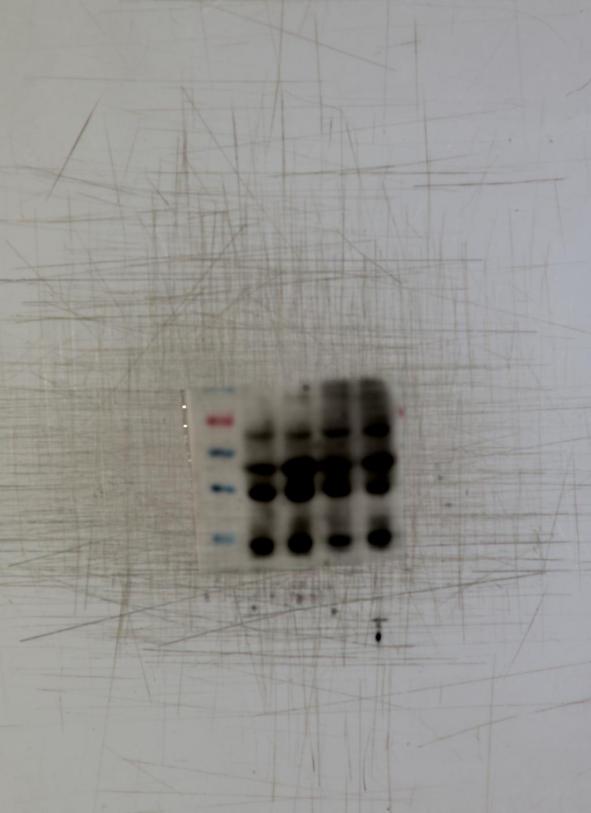
**

**70kDa**

**55kDa**

**43kDa**

**33kDa**

**TLR4**

**
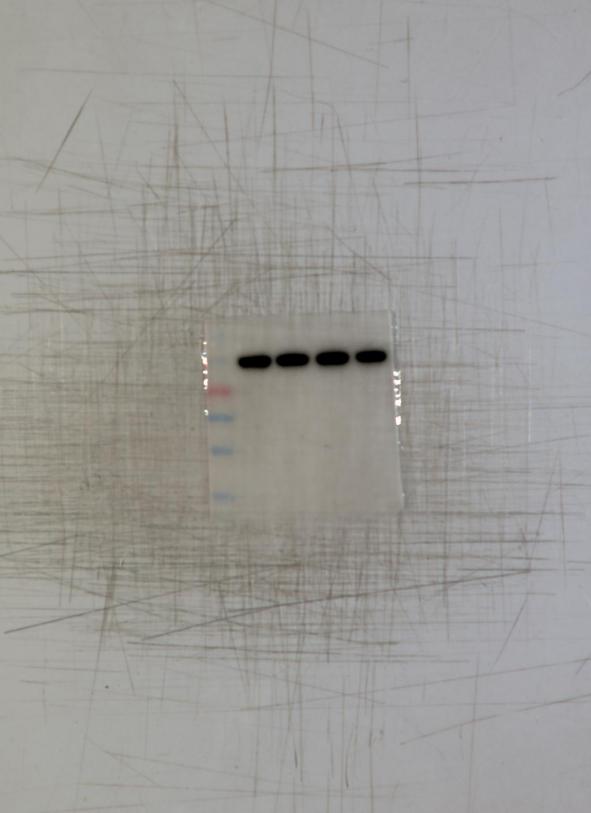
**

**95kDa**

**70kDa**

**55kDa**

**43kDa**

**33kDa**

**CPT1A**

**
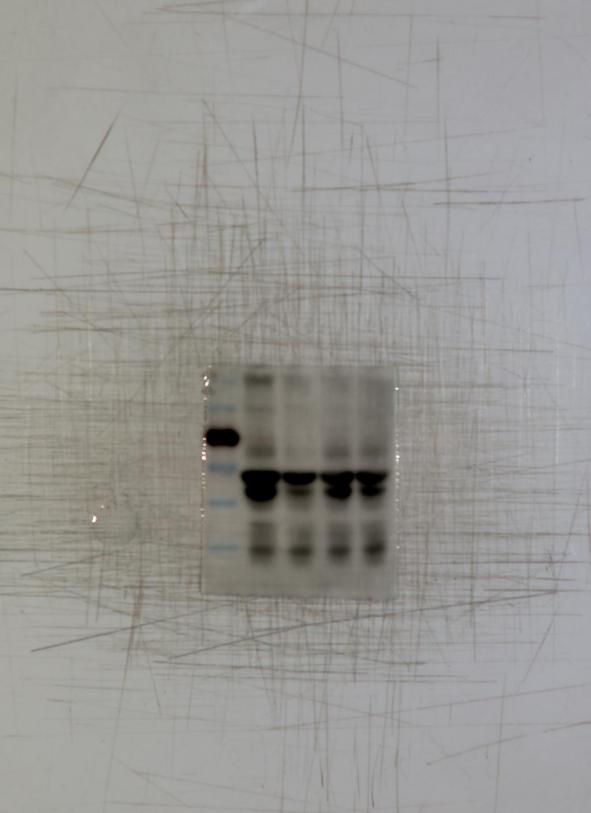
**

**95kDa**

**70kDa**

**55kDa**

**43kDa**

**33kDa**

**CD36**

**
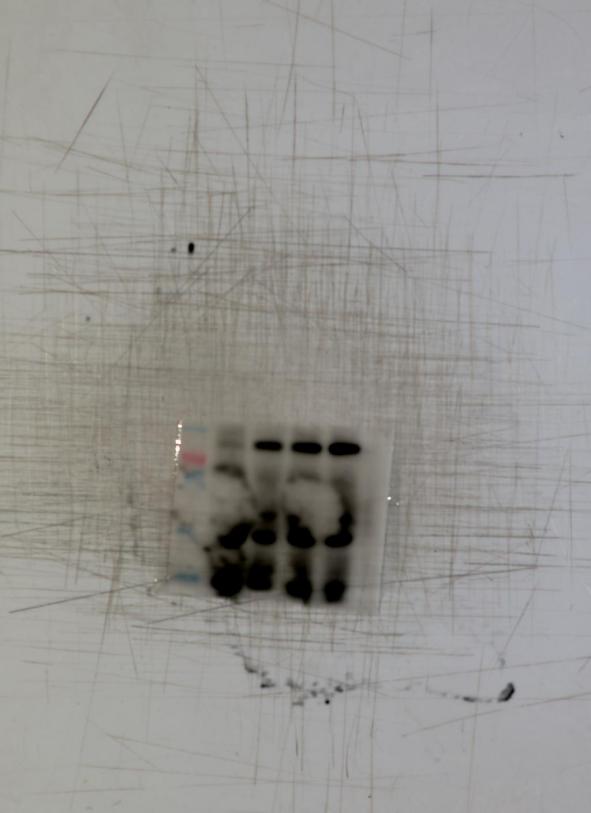
**

**95kDa**

**70kDa**

**55kDa**

**43kDa**

**33kDa**

**FABP1**

**
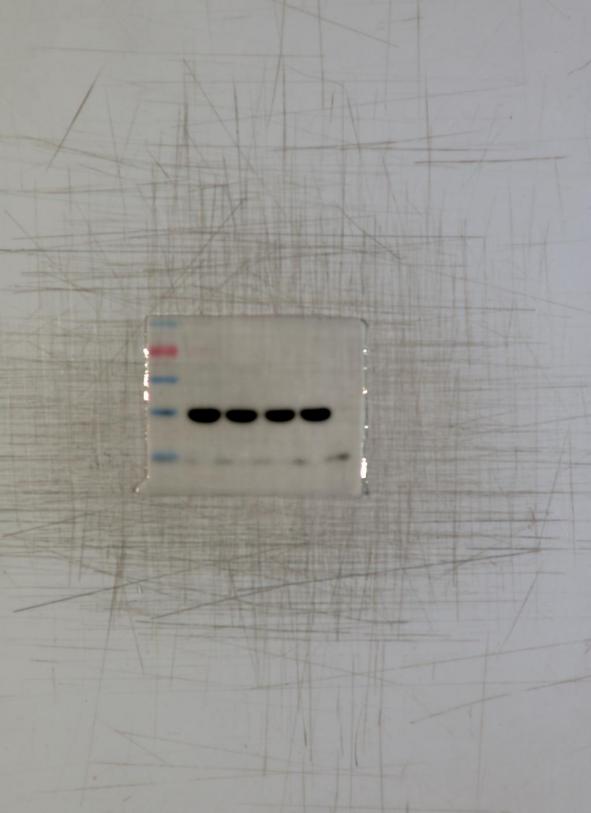
**

**95kDa**

**70kDa**

**55kDa**

**43kDa**

**33kDa**

**ATGL**

**
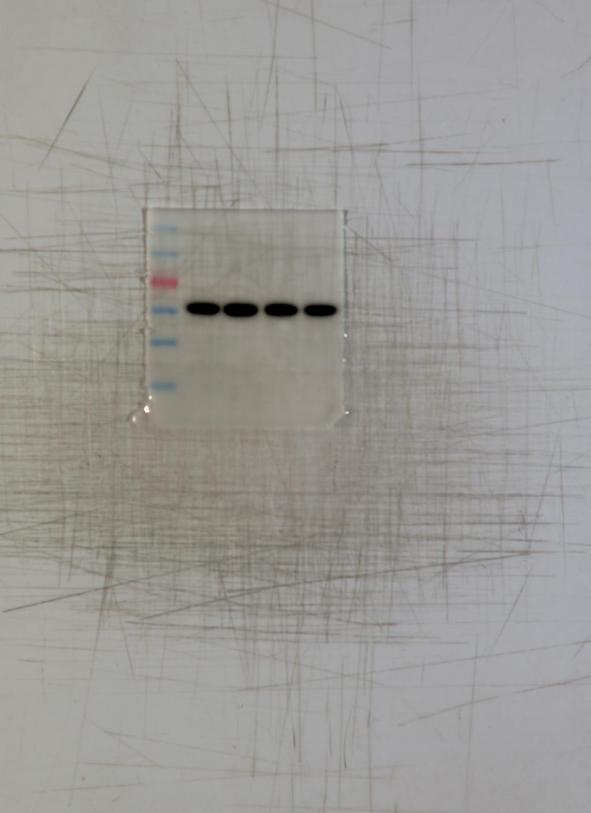
**

**130kDa**

**95kDa**

**70kDa**

**55kDa**

**43kDa**

**33kDa**

**PPARγ**

**
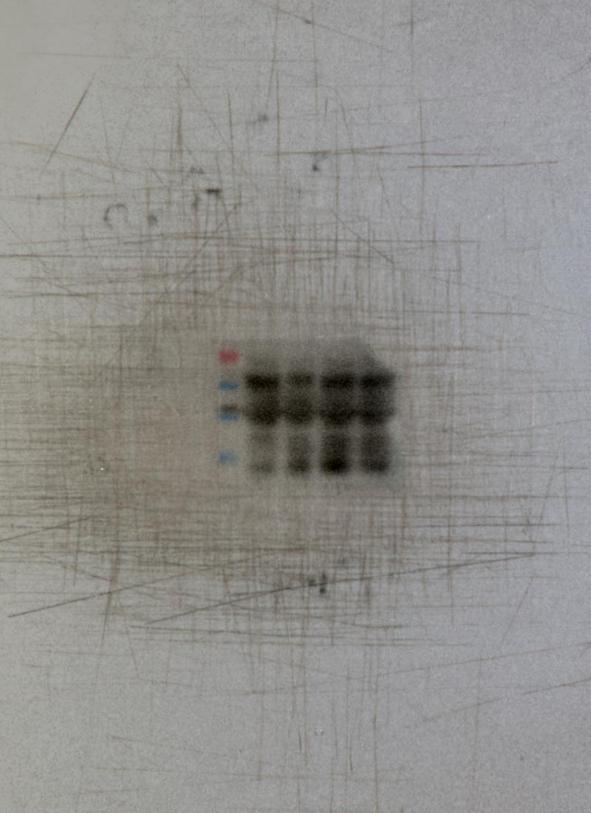
**

**70kDa**

**55kDa**

**43kDa**

**33kDa**

**GAPDH**

**
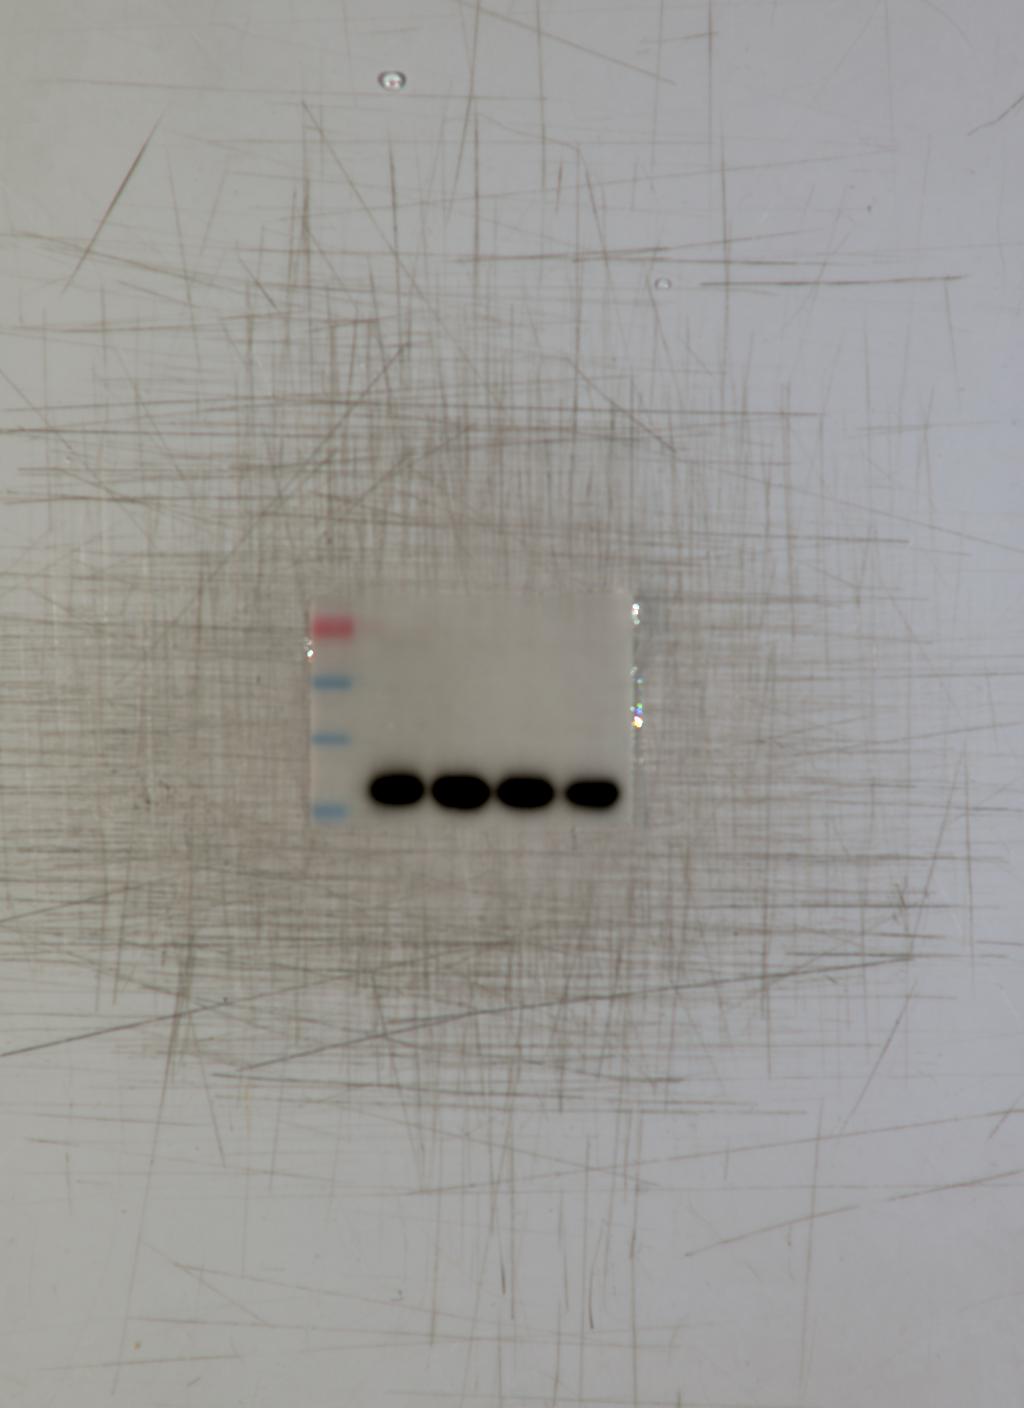
**

**70kDa**

**55kDa**

**43kDa**

**33kDa**

**PPARγ**

**
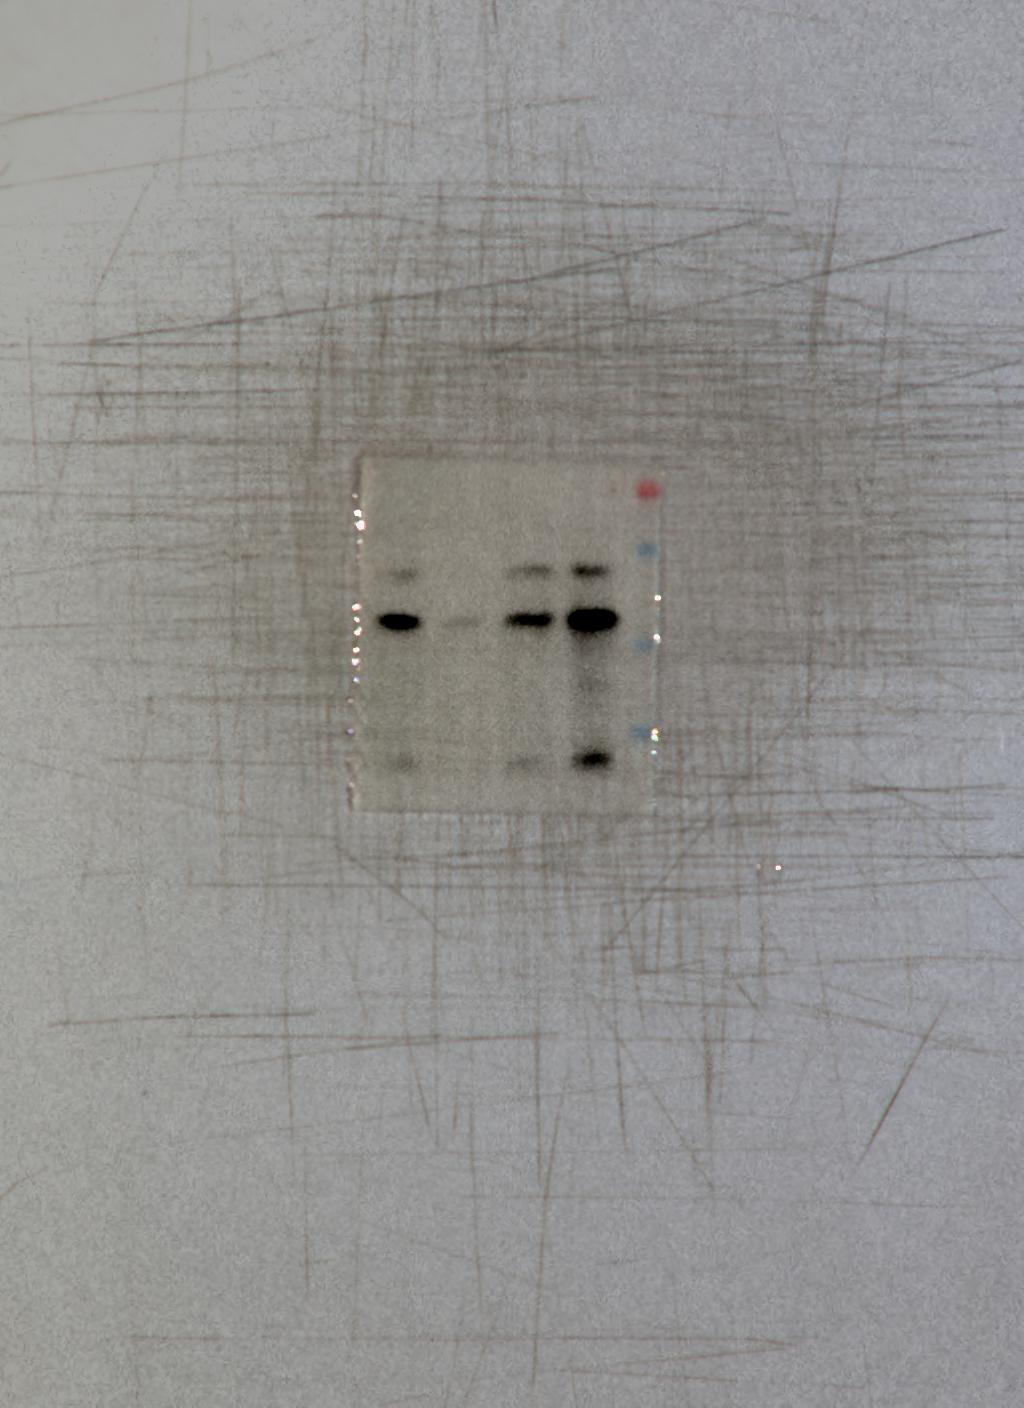
**

**70kDa**

**55kDa**

**43kDa**

**33kDa**

**β-Actin**

**
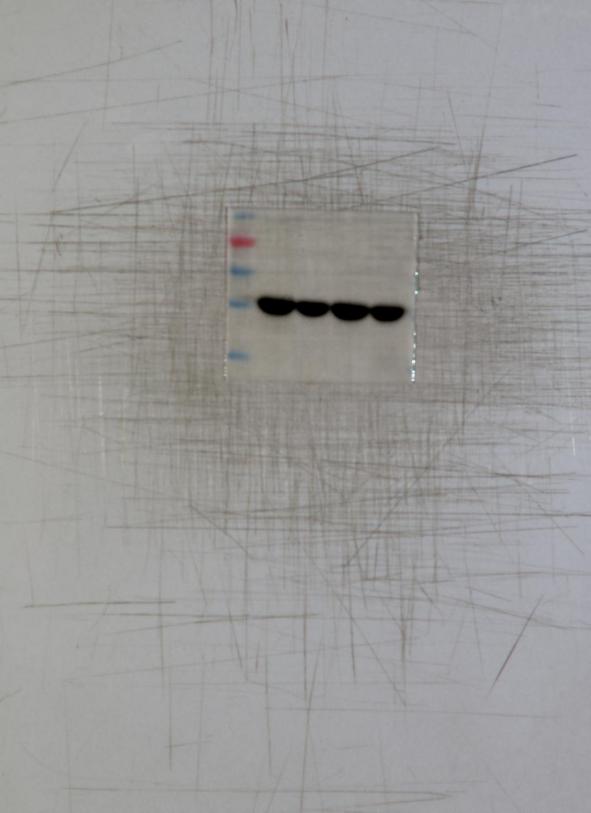
**

**95kDa**

**70kDa**

**55kDa**

**43kDa**

**33kDa**

The uncropped WB bands were used in Figure 2G and 4I. Their molecular weights were annotated with a protein ladder with the provided information.

**Supplementary Figure S2** T cells distribution in healthy recipients

**
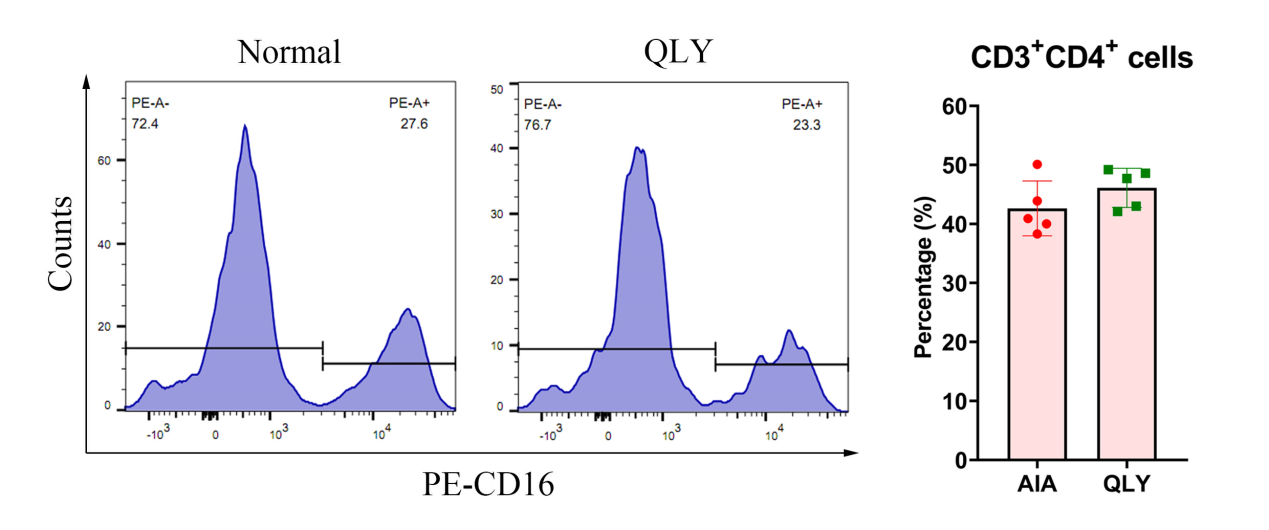
**

The data were generated by a FCM analysis.
